# Supplementary material
Source: PubMed Central journal article supplement (PMC3497364)
Supplement: AEM.02508-12_zam999103860so1.pdf [file AEM.02508-12_zam999103860so1.pdf]

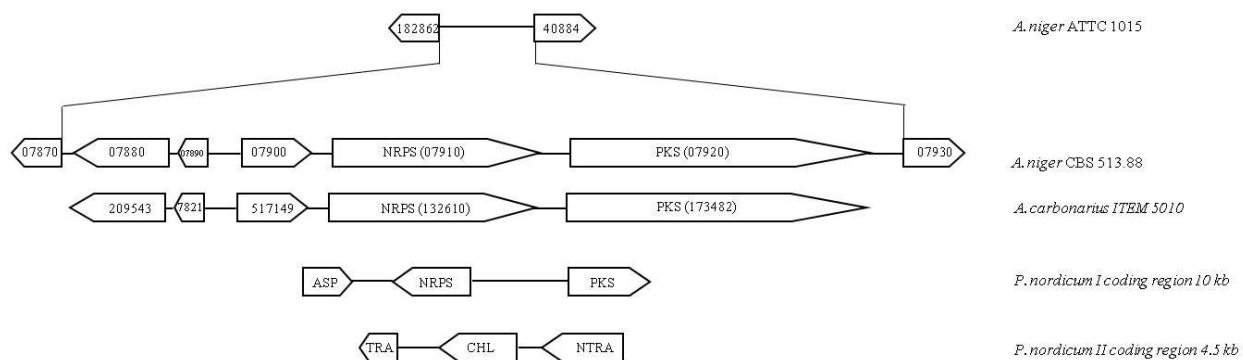

**Fig. S1** Comparative sequence analysis of the putative OTA gene cluster in *A. niger* (CBS 513.88 and ATCC 1015 strains), *A. carbonarius* and *P. nordicum*. Annotation ID either from JGI or NCBI are shown inside arrows.

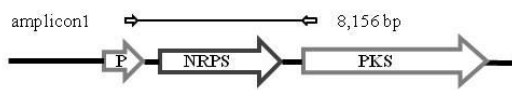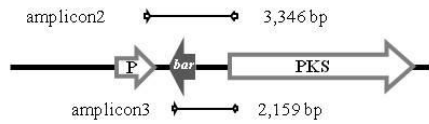

Amplicon 1&2: primers OTAnrsR6+OTAnrsF1  
 Amplicon 3: primers uBarR+OTAnrsF1

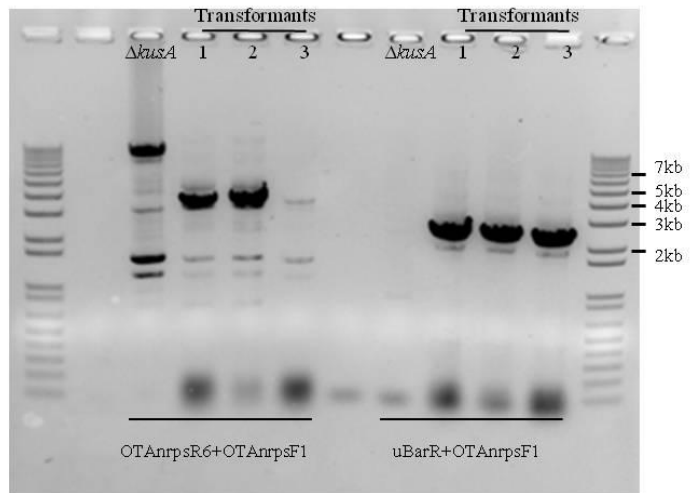

**Fig. S2** Electrophoresis gel of diagnostic PCR used for screening of the transformants obtained

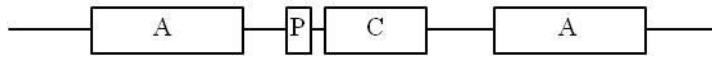

**Fig. S3** Domain structure of AcOTAnrps. A, adenylation; P, peptidyl carrier; C condensation domains
